# Supplementary material for: Inhibitory role of ginsenoside Rb2 in endothelial senescence and inflammation mediated by microRNA-216a
Source: PubMed Central journal article supplement — Mol Med Rep. 2021 Mar 30;23(6):415. doi: 10.3892/mmr.2021.12054 (PMC8025470; doi:10.3892/mmr.2021.12054), 2021-03-30
Supplement: Supplementary_Data.pdf [file Supplementary_Data.pdf]

Figure S1. Chemical structure of ginsenoside Rb2. Adapted from National Center of Biotechnology Information, Pubchem CID: 5458674 (1).

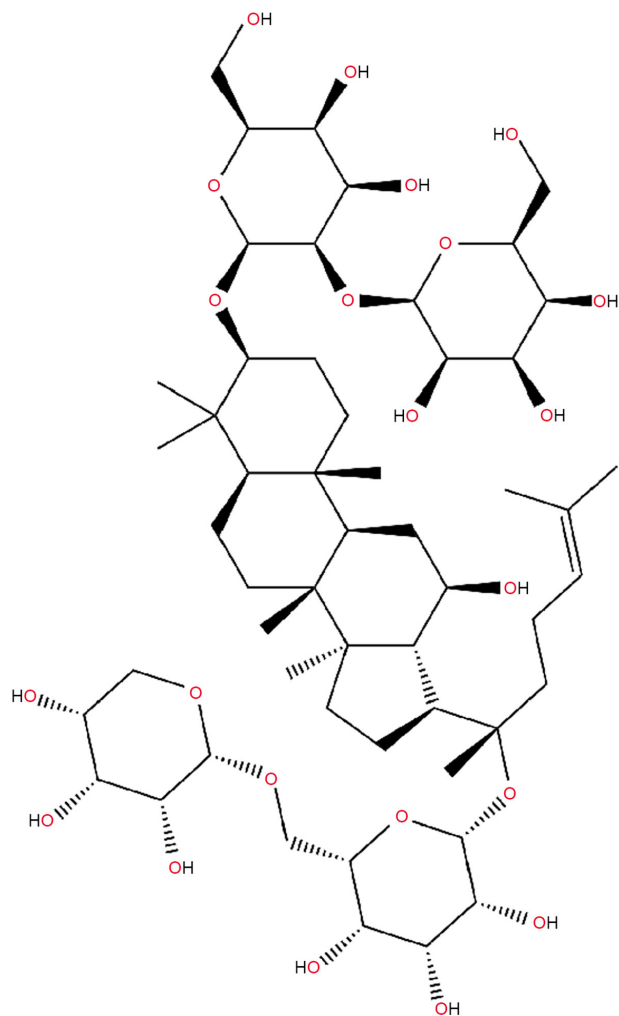

Figure S2. Expression level of miR-216a in population-doubling level 25 human umbilical vein endothelial cells transfected with Lv-miR-216a. \*\*P<0.01 vs. Lv-NC. miR-216a, microRNA-216a; NC, negative control; Lv-miR-216a, pre-miR-216a recombinant lentiviruses.

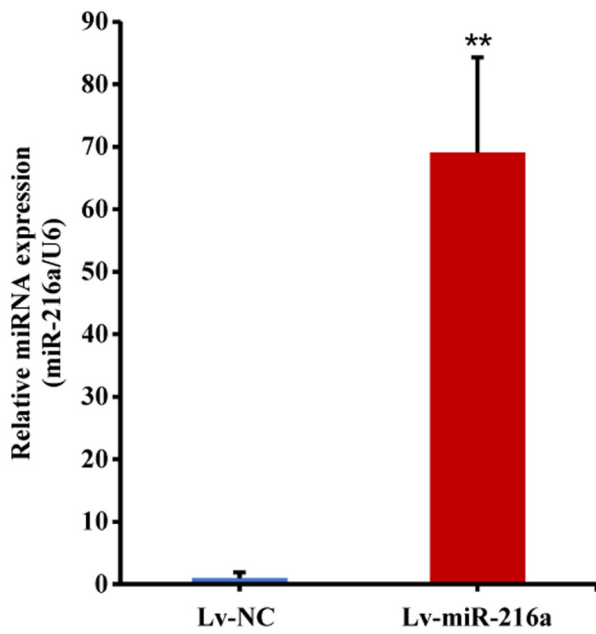

Figure S3. Effect of Rb2 on endogenous miR-216a expression in PDL44 HUVECs. A series of Rb2 concentrations (0.1, 1, 10 and 100  $\mu$ M) were applied to examine the effects of Rb2 on endogenous miR-216a expression in the senescent PDL44 HUVECs. \* $P < 0.05$  vs. control group. miR-216a, microRNA-216a; HUVECs, human umbilical vein endothelial cells; PDL, population-doubling level; Rb2, ginsenoside Rb2.

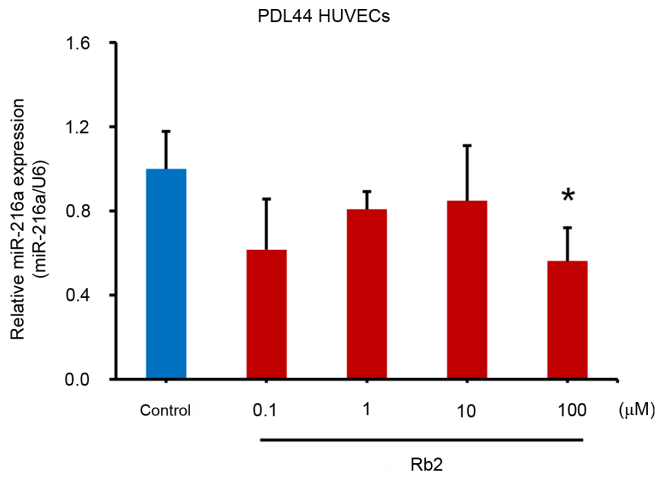

Figure S4. Effect of 10  $\mu$ M Rb2 on endogenous miR-216a expression in human aortic endothelial cells. \*P<0.05 vs. control group. miR-216a, microRNA-216a.

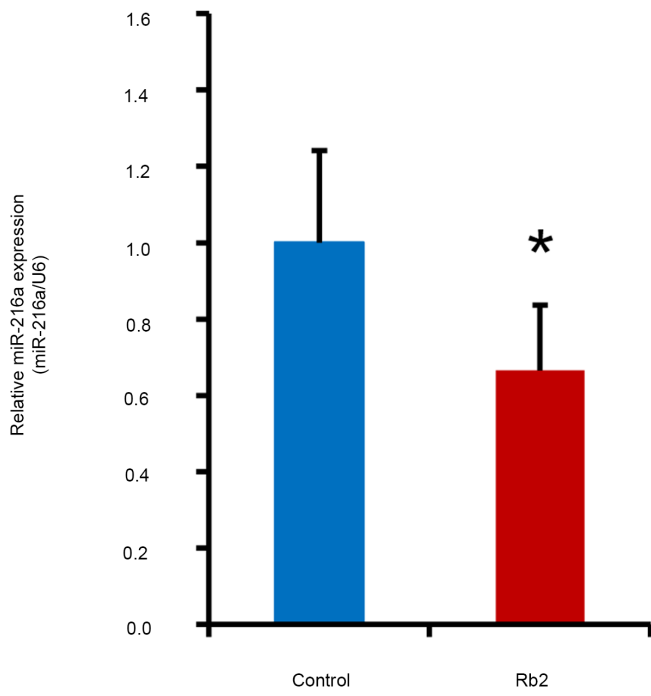

Figure S5. No effect of Rb2 on the proliferative ability of endothelial cells mediated by miR-216a in HUVECs. The cell proliferative ability was assessed in the senescent population-doubling level 25 HUVECs (at ~40 days after transfection of Lv-miR-216a) using the Cell Counting Kit-8 method, and the absorbance was detected at a wavelength of 450 nm on a LB960 microplate reader. \* $P < 0.05$ , \*\* $P < 0.01$ . miR-216a, microRNA-216a; HUVECs, human umbilical vein endothelial cells; NC, negative control; Lv-miR-216a, pre-miR-216a recombinant lentiviruses.

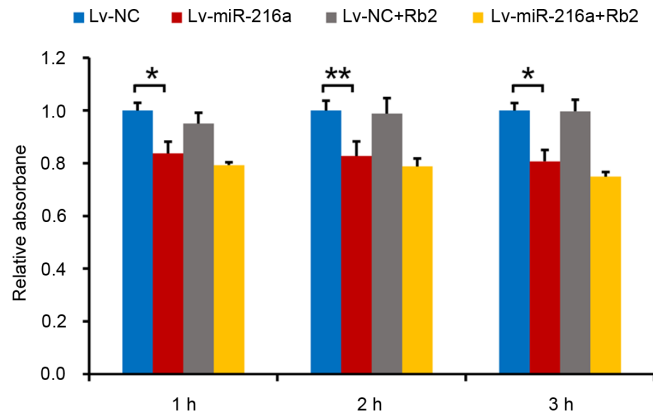

Figure S6. Expression level of miR-216a in PDL8 human umbilical vein endothelial cells transfected with miR-216a mimics. \*\*P<0.01. miR-216a, microRNA-216a; NC, negative control.

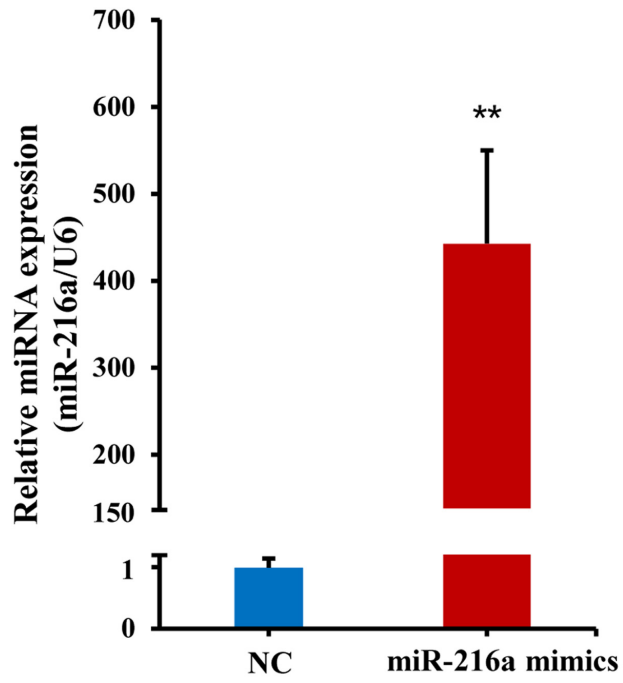

Table SI. Primers used for reverse transcription-quantitative PCR.

| Gene  | Direction | Sequences (5'→3')        |
|-------|-----------|--------------------------|
| p53   | Forward   | CGTGTGGAGTATTTGGATGACAGA |
|       | Reverse   | GGAGTCTTCCAGTGTGATGATGGT |
| p21   | Forward   | GAGCAGGCTGAAGGGTCCCCAGGT |
|       | Reverse   | GCTTCTGTGGGCGGATTAGGGCT  |
| ICAM1 | Forward   | CCATCGGGGAATCAGTGACTGT   |
|       | Reverse   | CATTATGACTGCGGCTGCTACCA  |
| VCAM1 | Forward   | GATAACAACCGTCTTGGTCAGCCC |
|       | Reverse   | CGCATCCTTCAACTGGCCTT     |
| Smad3 | Forward   | CGTGCGGCTCTACTACATC      |
|       | Reverse   | ACATTCGGGTCAACTGGT       |
| GAPDH | Forward   | GAAGGTGAAGGTCGGAGTCA     |
|       | Reverse   | GGAAGATGGTGATGGGATTTC    |

ICAM1, intercellular cell adhesion molecule 1; VCAM1, vascular cell adhesion molecule 1

## Reference

1. Huang Q, Gao B, Jie Q, Wei BY, Fan J, Zhang HY, Zhang JK, Li XJ, Shi J, Luo ZJ, *et al*: Ginsenoside-Rb2 displays anti-osteoporosis effects through reducing oxidative damage and bone-resorbing cytokines during osteogenesis. *Bone* 66: 306-314, 2014.
